# Supplementary material for: Safety Profiles of Tripterygium wilfordii Hook F: A Systematic Review and Meta-Analysis
Source: Front Pharmacol. 2016 Nov 8;7:402. doi: 10.3389/fphar.2016.00402 (PMC5099241; doi:10.3389/fphar.2016.00402)
Supplement: Supplementary file 4 [file DataSheet4.xls]

## Sheet: Sheet1
Author/year	Disease treated	Settings	Sample size	Duration	Means of intervention	Medication used (Dosage)	Combination	Comparison	Adverse events (TwHF/Control)
Ao Jianhua, et al/1994	Post-operation renal transplantation	Beijing	87/85	unclear	T	1.5mg/kgd, increase when reduce CsA.	BT: preoperation azathioprine 2-2.5mg/kg, intraoperation HSSC 3g and dexamethasone 1mg/kg, postoperation HSSC and prednisone and cyclophosphomide.	C: BT.	TwfH: 3amenorrhea. C: none.
Cao Ningli, et al/2013	HSPN	Jiujiang, Jiangxi	31/30	4ws	T and C	T: 1.5mg/kgd, <60mg/d, bid or tid. C: 1.0mg/kgd, bid or tid, increase to 1.5mg/kgd if still with proteinuria after 1.5m.	T: low molecular heperin calsium 100U/kgd, bid, subcutaneous injection. Dipyridamole, 3-5mg/kgd, bid or tid. Prednisone 1.5-2mg/kgd, bid or tid.	none	T: 1mild elevation of liver transaminase. C: 1mild elevation of liver transaminase
Cen Zhongwen/2013	RA	Foshan, Guangdong	18/18	12ws	T and C	10mg, tid	BT: methotrexate 10mg/w. T: prednisone 10mg/d.	none	T: 2gastrointestinal reaction, 1rashes, 1reduction of hemocyte, 1menstrual disorder, 2abnormal blood sugar. C: 3gastrointestinal reaction, 2rashes, 1reduction of hemocyte, 3menstrual disorder.
Chen Linnan, et al/1993	RA	Nanjing, Jiangsu	15/17	unclear	T and C	2tablets(each with 50μg triptolide, equal to 1g leave), tid.	BT: original hormone and reduction till withdrawal.	none	I:4gastrointestinal reaction(dry mouth, abdominal discomfort, loss of appetite, nausea, vomiting and increased frequency of stool), 1SGPT elevation to 131U/L, 1mouth and lips ulcer, 1obvious reduction of menstrual blood volume. II: 1loss of appetite and nausea.
Chen Qin, et al/2012	Pure glomerular hematuria	Hangzhou, Zhejiang	30/46	24ws	C	20mg, tid	none	T: Huoxuezhixue decoction.	TwfH: 4elevation of transaminase(1withdrawal), 4reduction of WBC, 1reduction of platelet, 7menstrual disorder(3withdrawal), 8gastrointestinal reaction. T: 2gastrointestinal discomfort, 1complication of pulmonary infection.
Cui Yun/2001	Uveitis	Changzhi, Shanxi	23/40	unclear	T	20mg, bid. Reduce to 10mg, bid if condition stable.	T: 1%atropine eye ointment. Dexamethasone 2.5mg/d. Atropine 1mg injection every other day. Cortisone eye drops. Prednisone 80-100mg/d, reduce 10mg/3ds to 20mg/d for 7-15ds. Indometacin 25mg, bid.	C: 1%atropine eye ointment. Dexamethasone 2.5mg/d. Atropine 1mg injection every other day. Cortisone eye drops. Prednisone 80-100mg/d, reduce 10mg/3ds to 20mg/d for 7-15ds. Indometacin 25mg, bid.	TwfH: 1withdrawal due to gastrointestinal reaction. C: no records.
Dai Xiangnong/2009	Hand eczema	Guangzhou, Guangdong	80/76	4ws	T and C	2tablets, tid	BT: urea ointment. T: NB-UVB light treatment.	none	8reduction of WBC(3<4*109/L, 8menstrual disorder, 4reduction of menstrual blood volume, 6GPT elevation.
Ding Yumin/1995	RA	Lanzhou, Gansu	17/15	12ws	T and C	T: 30mg/d. C: 60mg/d.	BT: ibuprofen, indometacin, fenbid.	none	T: 3reduction of WBC, 1nausea, 1abdominal pain. C: 8reduction of WBC, 4nausea, 4abdominal pain, 2diarrhea, 3amenorrhea, 3continous liver and renal function insufficiency, 1new liver function insufficiency, 2 withdrawal due to adverse events.
Duan Xifeng/1998	RA	Kaifeng, Henan	500/150	12ws	C	1tablet(30μg triptolide), tid	BT: prednisone.	T: Yubiwan 2.25g, tid for the 1st round, 2.25g, bid for the 2nd round.	TwfH: 11reduction of WBC, 13reduction of hemoglobin, 13GPT elevation, 18elevation of Cr and BUN, 8dental ulcer, 3urticaria, 51nausea and vomiting, loss of appetite and abdominal discomfort(4withdrawal). T: none.
Feng Guoqiang, et al/2002	photosensitive skin diseases	Shanghai	30/22	8ws	C	5tablets, bid	BT: cortex phellodendri cream or eczema cream.	T: herbal medicine.	TwfH: 1nausea, 2stomachache, 2liver function AG higher than normal. T: none.
Fu P, Mao CZ, Gong Y/1999	various	Kunming, Yunnan	9/9		T	30-60mg/d	none	none	reversible amenorrhea. Average amenorrhea time for 30mg/d 8.3ms and 4.2ms for 60mg/d.
Gao Changjing/1995	RA	Chaohu, Anhui	47/39	12ws	C	20mg, tid	none	T: mineral bath.	TwfH: 3angular cheilitis, 2diarrhea(1withdrawal due to blood stool), 2loss of appetite. T: 2skin itching.
Gao Jiajun, et al/1999	RA	unclear	35/28	24ws	T	20mg, bid	BT: sinomenine 80mg, tid. T: chloroquine 0.25g/d for 2ms, then 0.125g/d for 6ms.	C: BT.	TwfH: 11%skin itching, rashes and stomach discomfort. C: 32%skin itching, rashes and stomach discomfort.
Gao yongjun/2011	Chronic generallized eczema	Zhengzhou, Henan	50/52/48	4ws	T and C	1-2tablet, tid	I: Wudai ointment, twice/d.	II: Wudai ointment, twice/d.	I: 6nausea and loss of appetite, 2abdominal pain, 1reduction of menstrual blood volume, 1self feeling testis smaller than before, 1reduction of WBC, 1mouth and lips erosion, 1local erythema. III: 4nausea and loss of appetite, 2abdominal dicomfort, 1diarrhea, 2menstrual disorder, 1dry mouth, 1esophagus burning, 1decrease in sexual desire, 1hair loss. II: 1erythema, 2blush.
Gao Zengqiang/2008	CGN	Hangzhou, Zhejiang	15/13/14	15ws	T and C	20mg, tid	BT: ACEI/ARB, if necessary CCB and β blocker. III: Chailing decoction 1package/d, bid.	I: BT, Chailing decoction 1package/d, bid.	II: 2liver function injury (ALT elevation and AST), 2gastrointestinal reaction(nausea, vomiting and abdominal discomfort), 2reproductive reaction(amenorrhea and male infertility). III: 1liver function injury , 1gastrointestinal reaction, 1reproductive reaction. I: none.
Gong Rong/2007	PNS	Chengdu, Sichuan	28/26	>8ws	T	60mg/d for 4ws, then reduce to withdrawal	BT: persantine 25-50mg, tid. T: prednisone 1mg/d for 8ws, then reduce to withdrawal. Astragalus membranaceus 20ml/d with hormone for half a m. Application of GTW when reduce hormone.	C: BT, prednisone 1mg/d for 8ws, then reduce to withdrawal.	TwfH: 1menstrual disorder, normal after GTW reduction and addition of herbal medicine. 35%acne. C: 54%acne.
Guo Qingyin/2010	Children HSPN	Zhengzhou, Henan	30/30	12ws	T and C	1.5mg/kgd, tid, for 4ws, then 1mg/kgd for 8ws	BT: antianaphylaxis, antiplatelet, etc. T: benazepril 5mg/kgd or 10mg/d, heparin sodium 100IU/kgd IV dripping for 4ws.	none	3reduction of peripheral WBC(normal after GTW reduction), 4mild elevation of liver enzyme(ALT and AST<100U/L, normal after liver protection), 2epistaxis.
Han Ziming, et al/2006	HSPN	Xinxiang, Henan	43/32	12-24ws	C	1mg/kg	BT: prednisone 1mg/kg for 4ws.	I: BT, leflunomide 1mg/kg for 3days, then 0.35mg/kg for 3-6ms.	TwfH: 3reduction of WBC, 6mild gastrointestinal reaction. I: 4reduction of WBC, 4mild gastrointestinal reaction, 3ALT elevation.
He Qiubo, et al/2004	Psoriasis vulgaris	Zhengzhou, Henan	19/30	6ws	C	20mg, tid. Reduction if obvious relief.	BT: oleum morrhuae cream.	T: BT, acitretin 0.3-0.5mg/kgd.	TwfH: 2gastrointestinal reaction, 3menstrual disorder, 1abnormal blood routine, 1abnormal liver enzyme. T: 19dry mouth and cheilitis, 19dry skin and desquamation, 6itching, 6dry eyes, 3thinner skin, 1hair loss, 2ear stuffy, 2gastrointestinal reaction, 1abnormal liver enzyme, 3elevation of cholesterol, 4elevation of triglyceride.
He Shenghu, et al/1993	LN	Dangtu, Anhui	27/14	72-96ws	T	12-15g/d	T: prednisone 1mg/kgd	C: prednisone or CTX 0.2g/d IV dripping every day or every other day, or 0.05d, bid or tid, altogether<8g.	TwfH: 1transient reduction of WBC, 1menstrual disorder. C: 4hair loss, reduction of peripheral WBC and gastrointestinal symptoms, 4herpes zoster.
Hu Jian, et al/2001	JSLE	Tianjin	6/6	12-24ws	T and C	1-2mg/kgd	I: prednisone and methylprednisolone, CTX and HCQ.	none	children in both groups mild elevation of transaminase in 1-2ms, no cessation and no continous elevation. Normal after withdrawal.
Institute of Dermatology, Chinese Academy of Medical Sciences and Lei-gong-teng Research cooperative group of Fujian Jiangsu Province	lepra reaction	unclear	318/113	unclear	T	adult 30-40g	none	C: thalidomide 200-400mg/d, tid.	TwfH: 81 adverse events(gastrointestinal reaction like nausea, vomiting, loss of appetite, burning sensation of stomach, loose stool and diarreha), dizziness and fatigue. 13WBC<4000/mm3. C: 47 adverse events(dizziness, drowsiness, fatigue, dry mouth, epigastric oppressive pain, constipation, diarrhea and swollen limbs).
Ji Haiwang, et al/2001	RA	Xi'an, Shaanxi	43/39	8ws	C	20mg, tid	BT: fenbid.	T: BT, Qufengshiling No2.	TwfH: 12nausea, vomiting and loss of appetite, 3reduction of WBC, 6ALT elevation. T: 2gastrointestinal reaction.
Ji S.M., et al/2006	Kidney transplantation	unclear	82/39/102	240ws	T	I: 1mg/kgd. II: 2mg/kgd.	BT: methylprednisolone on the day of operation and 3rd postoperative day. Prednisone 80mg and tapered to 20mg/d at 1w and 6ms postoperatively. Azathioprine 1mg/kdd and then 0.5-1mg/kgd. Cyclosporine started at 6-7mg/kgd and then 200-300ng/ml, 150-200ng/ml and 100-150ng/l for serum trough levels at 1,3, and 6ms after transplantation. methylprednisolone	C: BT.	I: 8.5%opportunistic infection in 1-5 ys, 1.2%pulmonary infection within 3 ms. II: 15.4%opportunistic infection in 1-5 ys, 2.6%pulmonary infection within 3 ms. C: 9.8%opportunistic infection in 1-5 ys, 0.9%pulmonary infection within 3 ms. Leukopenia, liver dysfunction, or gastrointestinal events among the three groups showed no obvious difference. The prevalence of hypertension, hyperlipidemia, d…
Ji S.M., et al/2008	Proteinuria	unclear	21/15	48ws	T	1mg/kgd	BT: hypotensive drug.	C: BT, valsartan 80mg/d for 1w, then 80mg, bid.	TwfH: hyperkalemia 26.7%, fatigue 26.6%, sore throat 33.3%, gastrointestinal events 13.3% . C: hyperkalemia 4.8%, fatigue 4.8%, sore throat 4.8%, gastrointestinal events 4.8%.
Jiang Wei, et al/1988	LN	Nanjing, Jiangsu	37/94/50/26	unclear	T	20-25g	II: prednisone. III: prednisone and cyclophosphomide.	I: prednisone. IV: prednisone, 1g methylprednisolone or 4g hydrocortisone succinate.	II: 1.06% herpes zoster, 1.06% femoral head necrosis, 36.17% amenorrhea. III: 2% severe pulmonary infection, 2% femoral head necrosis, 4%hemorrhagic cystitis, 24% amenorrhea. I: 2.7% herpes zoster, 5.41%femoral head necrosis, 2.7%Iatrogenic diabetes, 5.41%amenorrhea. IV: 19.23% severe pulmonary infection, 3.85% septicemia, 7.89% herpes zoster, 7.69% femoral head necrosis, 7.89%Iatrogenic diabetes…
Jiangsu Province Leigongteng Research cooperative group/1976	lepra reaction	unclear	80/34	unclear	T	adult 30-40g	none	C: thalidomide 200-400mg/d, tid.	TwfH: 129 adverse events, 60 gastrointestinal reaction(2severe), 12 WBC<4000/mm3, 2WBC<3000/mm3. C: 28dizziness, 10swelling, 12gastrointestinal discomfort.
Lao Zhiying/1988	RA	Shanghai	44/47	unclear	T and C	10mg, bid or tid	unclear	unclear	Allergic reactions including high fever, facial blush, maculopapule and vesicular exthanthema. Gastrointestinal reaction including nausea, vomiting, abdominal pain and diarrhea. Oligospermia, menstrual disorder and amenorrhea. I: 10. II: 24. Dosage<30mg, 6dizziness, 1pain over the liver, 2gastrointestinal reaction, 15endocrine disorder, 13pigmentation. >30mg, 1allergic reaction, 3gastrointestinal…
Li Junxuan, et al/1995	Children leucoderma	Zaozhuang, Shandong	60/30	unclear	T	0.5%LGT cream	T: components of cream.	C: external use of 30%fructus psoraleae, bid.	TwfH: 3local red and swollen, itching and pain, some with mild erythema or swelling. C: more than half red and swollen, blister and burning pain, forced cessation.
Li Qinghua, et al/2005	CGN	Shaoxing, Zhejiang	30/28	8ws	T	10mg, tid	BT: blood pressure control and anti-infection. Persantine and lotensin. T: Huangkui capsule 5capsules, tid.	C: BT, Huangkui capsule 5capsules, tid.	T: 4abdominal distension and nausea, 2mild liver function injury , 2menstrual disorder. C: 3abdominal distension.
Li Ruilin/1988	RA	Honghu, Hubei	11/11	4-8ws	T and C	I: 40-50mg, tid. II: 40-60mg, tid.	none	none	I: 1abdominal discomfort, 1stomach burning, 2mild abdominal pain, 2nausea, 1reduction of WBC. II: 1loss of appetite, 8mild abdominal pain, 1abdominal distension, 1borborygmus, 2constipation, 4diarrhea, 1nausea, 2vomiting, 1perleche, 1dry mouth, 3SGPT elevation, 1mild reduction of WBC. Most gastrointestinal reaction mild.
Li Xiaoling/2010	Chronic nephritis	Nanjing, Jiangsu	30/30	8ws	T and C	I: 60mg/d, tid. II: 120mg/d, tid.	BT: hypotensive, anti-infection and diuretic drugs. Chailing decoction.	none	I: 6gastrointestinal reaction, 3rashes, 2liver injury, 2myelosuppression, 1abnormal menstruation. II: 7gastrointestinal reaction, 3rashes, 4liver injury, 4myelosuppression, 3abnormal menstruation. Gastrointestinal reaction and rashes often happen in 1week. 1 in II with WBC reduced to 2.6*109/L, after GTW reduction and liver protection, return 3.3*109/L. 1(II) still amenorrhea when treatment finis…
Li Xiayu/2001	IgAN	Hangzhou, Zhejiang	60/34	12ws	C	20mg, tid	none	T: Huobahuagen 5tablets, tid.	TwfH: 3reduction of WBC, 2GPT elevation, 3amenorrhea, 1hair loss. T: 2reduction of WBC.
Li Yanlin/2005	Children HSPN	Suzhou, Jiangsu	21/17	12-24ws	C	1mg/kgd	I: prednisone 1-2mg/kgd, generally reduction after 4ws.	II:prednisone 1-2mg/kgd, generally reduction after 4ws. Cyclophosphomide 8-12mg/kgd, maximus 500mg/d, altogether <150mg/kg.	TwfH: 1gastrointestinal reaction, 2abnormal liver function, 1reduction of WBC or platelet. II: 2gastrointestinal reaction, 1hemorrhagic cystitis, 1reduction of WBC or platelet.
Li Yuanyuan, et al/2010	Palmoplantar pustulosis	Shanghai	30/18	8ws	T and C	20mg, tid	BT: external use clobetasol propionate cream, bid, reduction in 3-4ws. T: isotretinoin 10mg, bid or tid.	none	T: all 30 dry face and desquamation, most obvious in 2-4ws, 12cracked mouth and lips and even bleediing, 2nausea and diarrhea, 3menstrual disorder, 1elevation of transaminase. C: 2menstrual disorder, 2elevation of transaminase.
Li Zhenhua/2000	RA	Xiantao, Hubei	80/40	unclear	T and C	I: 6-10tablets(each with crude LGT 40mg), tid. II: LGT 2tablets, bid.	I: Qitenghuoluo tablet.	none	I: 7abdominal discomfort, 4loss of appetite, 3stomachache. II: 4amenorrhea, 3SGPT elevation, 13abdominal discomfort, 9loss of appetite, 10stomachache, 5diarrhea, 2constipation, 9dry mouth, 4rashes, 2WBO.
Lin Limei/2004	OLP	Jinan, Shandong	47/47	12ws	T	1-1.5mg/kgd, tid	BT: folic acid, Vb6, Vc and povidone-iodine.	C: BT, Huobayinhua tablet 0.9g, tid, reduce to 0.54g, tid in2-4ws.	TwfH: 6menstrual disorder, 1reduction of WBC. C: none.
Lin Zhe/2008	IgAN	Harbin, Heilongjiang	28/28	unclear	C	1-1.5mg/kgd, tid	BT: anti-infection, hypolipidemic and immunity adjustment drugs.	T: BT, Shenyanzhixue decoction.	TwfH: AST and GPT difference, 3abnormal liver function. T: none.
Liu Jianshe, et al/2004	Chronic nephritis	unclear	88/42	96ws	T	2mg/kgd, tid for 1m, then 1mg/kgd tid.	BT:diet, herbal medicine and symptomatic treatment. T: dipyridamole 300mg/d, tid. Valsartan 80-160mg/d, qd.	C: BT.	few gastrointestinal reaction(nausea, abdominal distention), 1mild rashes(faded after symptomatic treatment), 2menstrual disorder, 22elevation of transaminase(<100U/L).
Liu Jinhua, et al/2006	RA	Zhangjiakou, Hebei	148/60	8-16ws	C	20mg, tid	none	T: Qufenghuoluo pill.	TwfH: 7loss of appetite, 3nausea and vomiting, 1abdominal pain, 2dizziness and drowsiness, 1rashes, 1elevation of transaminase, 1menstrual disorder. T: 6loss of appetite, 4nausea and vomiting, 1abdominal pain.
Liu Xunquan, et al/1997	Autosensitive dermatitis and allergic purpura	unclear	54/24/11/16/12	3ws	T and C	I+IV:4tablets/d, qid. II+V: 8tablets/d, qid.	BT: Leihu and triamcinolone. I+IV: prednisone 4tablets/d, qid.	III: BT, prednisone 6tablets, qd.	II+V: 1nausea, vomiting and palpation(withdrawal), 4reduction of WBC, 1reduciton of platelet. I+IV: none. III:none.
Lu Hongping/2013	RA	Beiliu, Guangxi	40/40	16ws	C	30-50mg/d for 2ws, then gradual reduction.	none	T: leflunomide 50mg/d for 5ds, then 20mg/d. methotrexate 15mg/d IV dripping for 1w then 20mg/d.	TwfH: 5, most vomiting, diarrhea and rashes. T: 7, most abdominal pain, diarrhea and nausea.
Lu Wei, et al/1993	RA	Shanghai	22/12	12ws	T	30g/d, tid	T: herbal medicine.	C: penicillamine.	TwfH: 1loose stool. C: 2rashes, 2proteinuria, 1nausea.
Lu Yanhong/2007	Generalized eczema	Baotou, Inner Mongolia	36/25	4ws	T	20mg, tid	BT: calamine lotion or 0.1%Leifunuer wet compress. T: cetirizine 10mg/d.	C: BT, cetirizine 10mg/d.	TwfH: 5mild reduction of WBC(in normal range). C: 2mild reduction of WBC(in normal range).
Mao Duanyang, et al/2009	IgAN	Wenzhou,Zhejiang	21/24/16	24ws	T	1mg/kgd	II: hormone 0.5mg/kgd, reduce 5mg/2w to less than half in 3ms when proteinuria decreased.	I: leflunomide 30mg/d for 3ds, then maintain 20mg. Hormone 0.5mg/kgd, reduce 5mg/2w to less than half in 3ms when proteinuria decreased.	II: 2abnormal liver enzyme, 5amenorrhea, 1skin itching, 1granulocytopenia(withdrawal). I: 1abnormal liver enzyme, 1skin ecchymosis, 1hair loss. III: 1abnormal liver enzyme(withdrawal in 12th week), 1elevation of blood sugar in 2ws.
Meng Lanfen/2001	NS	Hechi, Guangxi	38/40	unclear	T	2mg/kgd, tid for 4ws, then reduce to 1.5mg/kgd for 4ws, then reduce to 1mg/kgd for 6-12ms.	T: Huobayinhua tablets 5tablets, tid for 8ws, then reduce to 2tablets, tid.	C: prednisone 1mg/kgd for 8-10ws, then gradual reduction for 12-24ms. Cyclophosphomide 200mg every other day, IV dripping, altogether 6-8g.	TwfH: 6nausea and loss of appetite, 3skin pigmentation. C: 13cushing's syndrome, 5nausea and vomiting, 2hair loss, 2ulcer.
Min Jing, et al/2012	RRA	Xiaogan, Hubei	25/25	12ws	T	20mg, tid	BT: NSAID. T: leflunomide 10mg/d.	C: methotrexate 15mg/w.	TwfH: 2gastrointestinal reaction, 1reduction of WBC, 1abnormal liver function, 1rashes, 5respiratory infection. C: 5gastrointestinal reaction, 3reduction of WBC, 1abnormal liver function, 1rashes, 1respiratory infection.
Pang Xiaowen, et al/2003	Acne conglobata	unclear	25/21/20	4ws	T	20mg, bid	BT: 3%boric acid wet compressing, twice. 0.3% ciprofloxacin ointment, twice. I: minocyline 50mg, tid for 4ws, 50mg, bid for 4ws, 50mg, qd for 4ws.	II: BT, minocyline 50mg, tid for 4ws, 50mg, bid for 4ws, 50mg, qd for 4ws. III: BT, tetracycline 0.5g, bid for 4ws, 0.5g, qd for 8ws.	II: 2mild ALT elevation(restore 2ws after drug withdrawal), 1mild dizziness, 1mild loss of appetite and nausea. II: 1mild dizziness and diplopia. III: 1mild ALT elevation(restore 2ws after drug withdrawal), 1mild loss of appetite and nausea.
Qian Yeyong, et al/1995	renal transplantation	unclear	16/21	48-56ws	T	1±0.5mg/d	T: CyA and prednisone.	C: CyA and prednisone. Azathioprine 0.5mg/kgd.	TwfH: 13abnormal ALT, 10abnormal bilirubin, 8patients infection 10times(5virus infection, 4bacteria infection and 1fungal infection), 1reduction of WBC, 1glaucoma. C: 11abnormal ALT, 20abnormal bilirubin, 11patients infection 19times(9virus infection, 9bacteria infection and 1fungal infection).
Qu Zhe/2009	Pemphigus vulgaris	Fujin, Heilongjiang	24/24	8ws	T	20mg, bid/m	BT: famotidine 20mg, bid. Ceftriaxone or azithromycin if necessary. External use of potassium permanganate. T: prednisone 60mg/d for moderate, 80mg/d for severe, addtion or reduction if necessary.	C: prednisone 0.5mg/kgd, azathioprine 50mg, bid. Addtion or reduction if necessary.	TwfH: 15loss of appetite in 5th, 6th and 8th week(1not conform to treatment and lost touch), 13elevation of blood sugar. C: 2pneumonia in 7th and 8th week, 8diarrhea in 4th, 6th and 7th week, 19loss of appetite(1not conform to treatment and lost touch), 5reduction of WBC, 8elevation of liver enzyme, 11elevation of blood sugar.
Ren Xianqing/2007	various	Zhengzhou, Henan	17/16/26	4ws	T and C	I:1mg/kgd. II: 2mg/kgd. III: 2mg/kgd.	III: glucurone(<7ys 0.1g, tid.>7ys 0.2g, tid)	none	I: 2ALT elevation(1 in 2ws, 1 in 4ws), 1mild diarrhea. II: 7ALT elevation(4 in 2ws, 3 in 4ws). III: 5ALT elevation(2 in 2ws, 3 in 4ws).
Rong Yonghua/2007	RA	Zhoushan, Zhejiang	60/30	12ws	C	20mg, tid	none	T: Bushenqushijuanbi decoction.	TwfH: 8menstrual disorder and amenorrhea. T: 3abdominal discomfort.
Shen Jianping, et al/2013	ENL	unclear	18/16	4-8ws	T and C	60-80mg/d for 4ws, maintain 20mg/d if injury gone. If still some injury , remain 45mg/d.	II: corticosteroids not more than original, then reduce 5-10mg/2w.	none	2withdrawal early in treatment for nausea and vomiting. 1mild nausea and vomiting, 1skin itching in 2-3ws, relieved after antihistamine drugs.
Shen Xiaofen/2010	Pure anaphylactoid purpura	Deqing, Zhejiang	32/32/32	1w	T and C	1mg/kgd	BT: antibiotis for upper respiratory infection. I: compound glycyrrhisim 2tablets/d, potassium chloride sustained release 500mg/d. II: Fufangdanshen tablet 3tablets/d.	III: BT, compound glycyrrhisim 2tablets/d, loratadine 10mg/d, potassium chloride sustained release 500mg/d.	I: 4gastrointestinal reaction, 1swollen lower limbs, 3reduction of WBC, 1reduction of red blood cell. II: 3gastrointestinal reaction, 4reduction of WBC, 1reduction of red blood cell, 2liver function injury . III: 2swollen lower limbs.
Shen Yunzhang, et al/2007	Psoriasis vulgaris	Deqing, Zhejiang	112/96	4ws	T	25ml, bid	BT: halcinonide cream once/d.	C: BT.	TwfH: 11gastrointestinal reaction, 3extended menstruation, 1mild reduction of WBC. C: none.
Sun Ruihua/1999	RA	Shanghai	38/38	12ws	C	10mg, tid	none	T: Zhengqingfengtongning tablets 40mg, tid. If no adverse events, increase to 60mg, tid from the 2nd week.	TwfH: 6reduction of WBC, 3GPT elevation, 1proteinuria, 7rashes, 5skin itching, 3excessive sweating, 12gastrointestinal reaction, 6abnormal menstruation. T: 2rashes, 3skin itching, 1excessive sweating.
Sun Wei, et al/2001	CGN	Nanjing, Jiangsu	48/34/24/21	unclear	T and C	I: 15g. II: 15g. III: 2tablets(each with 33μg triptolide), tid. IV: 20mg, tid.	I: components of Shenyanling granule. II: components of Shenyanheji NO2.	none	I: 3nausea, vomiting and loss of appetite, 2WBC<3.5*109/L, 2menstrual disorder. II: 3nausea, vomiting and loss of appetite, 2WBC<3.5*109/L, 2menstrual disorder, 3SGPT elevation. III:5nausea, vomiting and loss of appetite, 3WBC<3.5*109/L, 2menstrual disorder, 4SGPT elevation, 1skin pigmentation. IV: 5nausea, vomiting and loss of appetite, 3WBC<3.5*109/L, 2menstrual disorder, 4SGPT elevation, 1skin…
Sun Xuanjing/2012	DN proteinuria	Nanjing, Jiangsu	30/30	12ws	T	10-20mg, tid	BT: hypoglycemic, hypotensive drugs and herbal medicine.	C: BT.	TwfH: 2abnormal liver function, 1reduction of WBC, 1gastrointestinal discomfort, 1hyperkalemia. C: 1doubled Cr, 3hyperkalemia.
Tao Xuelian, et al/1990	RA	Beijing	32/31	12ws	T and C	T: 30mg/d. C: 60mg/d.	T: 2 long term prednisone, use GTW when prednisone<10mg/d.	none	T: 11rashes, 1nausea, 1abdominal pain. C: 15rashes, 3nausea, 3abdominal pain, 7diarrhea, 10amenorrhea, 1vaginal bleeding after menopause, 4withdrawal due to adverse events.
Tong Juntang/2011	Psoriasis	Jiangmen, Guangdong	40/40/41	2ws	T	20mg, tid	I: Tongtaifen 1mg. Vc 100mg, tid. III: Tongtaifen 1mg. Vc 100mg, tid. Fufangdanshen injection 20ml.	II: Tongtaifen 1mg. Vc 100mg, tid. Fufangdanshen injection 20ml.	I: 4loss of appetite and fatigue, 1elevation of transaminase. III: 4dizziness and fatigue, 2menstrual disorder, 2elevation of transaminase. II: 2menstrual disorder, 2fatigue.
Wang Baoxi/1989	Lupus erythematosus	Beijing	23/19	2-84ws	T	1g(equal to 10g crude drug), tid	T: prednisone if necessary, hydrocortisone or silicon cream.	C: prednisone 30-60mg/d, calsium and potassium.	TwfH: 7reduction of peripheral WBC in 4ws(2<4000/L), 2proteinuria in 4ws. C: no records.
Wang Cihua, et al/2005	RA	Xiangxiang, Hunan	72/33	7ws	T	6g	T: Santengjuanbi decoction	C: Zhengqingfengtongning 2tablets, tid.	TwfH: 15abdominal dull pain, nausea and vomiting. C: 7abdominal dull pain, nausea and vomiting.
Wang Hongmei/2007	Palmoplantar pustulosis	Dalian, Liaoning	28/26	8ws	T and C	20mg, tid	BT: triamcinolone acetonide cream and silicon cream. T: acitretin 30mg/d.	none	T: different levels of dry mouth and lips and desquamation, 2elevation of blood liqid, 2elevation of transaminase, 1reduction of hemogram WBC, 1abdominal discomfort. C: 1reduction of hemogram WBC, 2menstrual disorder.
Wang Hongwu/2008	NS	Huai'an, Jiangsu	48/51	>24ws	T	1mg/kgd for 8ws if effective. If no, 2mg/kgd, tid for 4ws, then reduce 10%/w to 10-20mg/d for>6ms.	T: prednisone 30mg/d, tid for 8ws if effective. Reduce 10% /w till withdrawal then reduce GTW.	C: prednisone 30mg/d, tid for 8ws if effective. Reduce 10% /w till withdrawal then reduce GTW.	TwfH: 8loss of appetite and nausea, 1transient SGPT elevation, 1reduction of WBC. C: 2ulcer, 18cushing's syndrome, 4blood pressure elevation(1death due to complication), 5steroid diabetes mellitus, 8infection(1death), 4blood pressure elevation(stopped hormone and took GTW), 4hair loss, 3SGPT elevation.
Wang Jidong, et al/2003	Senile PNS	Huai'an, Jiangsu	21/20	48-80ws	T	1mg/kgd, tid	BT: Astragalus membranaceus and aspirin. II: prednisone 0.4-0.5mg/kgd.	C: BT, prednisone 0.8-1.0mg/kgd, gradual reduction.	TwfH: 1blood pressure elevation, 2hyperglycemia, 1infection, 1mental excitation, 5reduction of WBC, 3liver injury. I: 6blood pressure elevation, 9hyperglycemia, 5infection, 3femoral head necrosis, 9mental excitation.
Wang Jing, et al/2011	RNS	Bengbu,Anhui	40/20	24ws	C	20mg, tid	C:prednisone 30-60mg/d.	T: prednisone 1mg/kgd, if necessary add leflunomide. Prednisone 0.8mg/kgd if not effective.	TwfH: 5amenorrhea, 1reduction of WBC, 4elevation of transaminase. T: 3nausea, 2mild diarrhea, 3GPT elevation in 2ws.
Wang Qingwen, et al/1991	PIgAN	Nanjing, Jiangsu	53/26/12	24-144ws	T	I: 20-25g. II: total terpenoid 0.2-0.3g(0.1g equal to crude drug 1g), tid.	BT: Yishen pill or Qingshen pill, 40-45pills, bid.	III: persantine 75-100mg, tid.	I: 7loss of appetite, nausea and vomiting, 2reduction of WBC, 3abnormal liver function. 8/22amenorrhea and reduction or increase of menstrual blood volume for long term. II: 3gastrointestinal reaction, 1/8 menstrual disorder. III: no records.
Wang Shitao/2004	RA	Jinan, Shandong	30/30	8ws	T	15g	T: herbal medicine.	C: herbal medicine. Methotrexate 10mg/w.	T: 5loss of appetite, 6nausea and vomiting, 10abdominal pain and diarrhea, 2anemia, 2oligospermia, 2asthenospermia, 2amenorrhea, 6reductiong of menstrual blood volume, 3menstrual disorder, 6palpation, 5chest stufly, 3arrhythmia, 2changed electrocardiogram, 4pigmentation, 2dental ulcer, 2skin itching, 2dizziness, 6fatigue, 1insomnia. C: 15loss of appetite, 19nausea and vomiting, 12abdominal pain a…
Wang Wei/2006	Chronic urticaria	Xinxiang, Henan	60/60	unclear	T	2tablets, tid	T: cetirizine 10mg/d, persantine 50mg, tid.	C: astemizole 10mg/d.	TwfH: 2mild dizziness, 2mild nausea, 1menstrual delay. C: 2mild dizziness.
Wang Yuanfang/2007	Severe Children HSPN	Anyang, Henan	15/17	24ws	C	1mg/kgd	I:prednisone, common dosage for 4ws, then reduction.	II: original hormone, cyclophosphomide 10mg/kgd, maximus 500mg/d, altogether <150mg/kg.	TwfH: 1gastrointestinal reaction, 2abnormal liver function, 1reduction of WBC or platelet, 3cushing's syndrome. II: 3gastrointestinal reaction, 1abnormal liver function, 1reduction of WBC or platelet.
Wu Bing/2013	Glomerulonephritis	Zhenjiang, Jiangsu	30/30	8ws	T and C	1mg/kgd, tid	BT: persantine, Zhiling capsule and symptomatic treatment. T: valsartan 80mg/d.	C: BT.	T: 1/12menstrual disorder, restore after GTW reduction. C: 1abnormal liver function, restore after GTW reduction and liver protection.
Wu Min, et al/2005	EORA	Changzhou, Jiangsu	31/31	48ws	T	60mg/d	BT: diclofenac sodium, prednisone 5-10mg/d, NSAID. T: sulfasalazine 2g/d after 2ws.	C: BT, methotrexate 10mg/w.	T: 12 in all, 9mild gastrointestinal discomfort, 3liver function injury , 1reduction of WBC. C: 11 in all, 2liver function injury in 1-2ms.
Xu Jianguo/2007	Renal insufficiency	Liyang, Jiangsu	42/36	12ws	T	treatment dosage 20mg, tid. Maintenance 20-30mg/d.	BT: lotensin and telmisartan.	C: BT.	TwfH: 50%amenorrhea and menstrual disorder. About 30% reversible ALT elevation in 1-4ms. C: no records.
Xu Jianguo/2007	IgAN	Nanjing, Jiangsu	12/12	unclear	T	2mg/kgd, tid. Generally 40mg, tid.	T: benazepril 10mg/d. Xinshenyan capsule 100mg, bid.	C: prednisone. Benazepril 10mg/d.	TwfH: 2amenorrhea, 1menstrual disorder. C: 4obvious cushing's syndrome and facial acne, 4mild abnormal liver function in 3ms, SGPT and SGOP to 70U/L, 48U/L.
Xu Qiulian/2006	HSPN	Shangqiu, Henan	36/30	12ws	T and C	T:unclear. C: 1mg/kgd, tid.	BT: hormone and anticoagulation. T: cyclophosphomide 0.5g/m2m and Vc IV dripping.	none	T: 5mild nausea and loss of appetite, 2dental ulcer, 1WBC<4*109/L. C: no records.
Xu Taoming/2003	Chronic nephritis	Wenling, Zhejiang	51/45	unclear	T	20mg, tid for 3-6ms, maintain 20-30mg/d for 1-2.5ys.	BT: herbal medicine, ACEI/ARB and CCB.	C: BT, captopril, enalapril, amlodipine, nifedipine and betaloc.	TwfH: 12amenorrhea in 3ms, restore automatically after withdrawal. 6liver function injury . 1gastrointestinal reaction, 2pigmentation. C: 1gastrointestinal reaction.
Xu Xizhao/1993	ITP	Meimen, Jiangsu	37/25	12ws	T	30mg/d, tid	T: prednisone 30mg/d, reduce 5mg/w to 5mg/d according to condition.	C: prednisone 30mg/d, reduce 5mg/w to 5mg/d according to condition.	TwfH: 7obesity, 7hairiness, 4acne, 9rashes, 1nausea, 1abdominal pain, 1blood pressure elevation(22/12kpa). C: many obesity, hairiness and acne, 2elevation of blood sugar(<9.5mmol/L), 1obvious blood pressure elevation(24/13kpa), 1gastrointestinal bleeding. All cessation.
Xu Zixin/2008	CGN	Beihai, Guangxi	21/20/23	12ws	T and C	10mg, tid	BT: blood pressure control and anti-infection. Persantine and lotensin. T: low molecule heparin sodium 2500U subcutaneous injection.	III: BT, low molecule heparin sodium 2500U subcutaneous injection.	I: 1mild liver function injury with GPT to 60U/L. II: 1mild liver function injury with GPT to 60U/L, 1menstrual disorder. III: 1signs of hemorrhage.
Yan Guopeng, et al/2000	RA	Shijiazhuang, Hebei	40/30	unclear	C	2tablets, tid	C: prednisone 5-10mg/d.	T: herbal medicine. Few used LGT tablet 1tablet, bid. Immediate withdrawal after improvement.	TwfH: 9withdrawal due to abnormal liver function or severe gastrointestinal reaction. Most patients osteoporosis or osteoporosis worsened. T: none.
Yang Huaizhu/2007	Eczema	Taizhou, Zhejiang	30/30	8ws	T	1-1.5mg/kgd, tid, <80mg/d.	T: local use of doxepin cream.	none	TwfH: 1peripheral WBC<4*109/L, 3mild gastrointestinal reaction, 2menstrual disorder. C(healthy): no records.
Yang Jianhui/2001	Primary glomerulonephritis	Jinan, Shandong	101/102/90/50/103/66/144	unclear	T and C	I: 20-40mg, tid. V: 20mg, tid. VI: 20mg, tid.	V: Huobaiyinhuagen tablet 5tablets, tid. VI: Zushima tablet 3tablets, tid.	II: Huobaiyinhuagen tablet 5tablets, tid. III: Zushima tablet 3tablets, tid. IV: Qingtengjian tablet 5tablets, tid. VII: Huobaiyinhuagen tablet 5tablets, tid. Zushima tablet 3tablets, tid.	I: 8gastrointestinal reaction, 8menstrual disorder, 4reduction of WBC, 19ALT elevation, 3elevation of SCr. V: 9gastrointestinal reaction, 8menstrual disorder, 6reduction of WBC, 24ALT elevation, 2elevation of SCr. VI: 12gastrointestinal reaction, 10menstrual disorder, 6reduction of WBC, 6ALT elevation. II: 5gastrointestinal reaction, 5menstrual disorder, 1reduction of WBC, 15ALT elevation, 2eleva…
Yang Xianhua/1995	PNS	Hengyang, Hunan	40/20	4-12ws, longest 48ws	T	20mg, tid	T: prednisone 30mg/d, persantine 50mg, tid.	C: prednisone1mg/kgd, then reduce 5mg/w to 10mg/d after relief.	TwfH: 20%gastrointestinal discomfort, 2%reduction of WBC. C: no records.
Yao Wancang/2004	AS	Guyuan, Ningxia	145/115	48ws	T	10ml(1ml equal to 16mg LGT soaking), bid	none	C: sulfasalazine 1st week 0.5g, bid, 2nd week 0.5g, tid, 3rd week 0.75g, tid, 4th week 0.75-1.0g, tid and maintain. NSAID if necessary.	TwfH: 12.6%stomach discomfort, loss of appetite and stomachache, 8.3%sexual dysfunction, 21.2%pigmentation, 36.5%young women menstrual disorder and amenorrhea. C: 3ALT elevation.
Yao Wancang/2004	RA	Ningxia	392/196	24ws	T	10ml(1ml equal to 6mg LGT soaking), bid	none	C: indometacin 25mg, tid. Ibuprofen 2granules, bid.	TwfH: 16nausea, anorexia and abdominal discomfort, 32/137 menstrual disorder and amenorrhea. C: 18gastrointestinal reaction.
Ye Tianshen, et al/2009	Active RA	Wenzhou,Zhejiang	29/31	6ws	T and C	20mg, tid	BT: celecoxib capsule 0.1g/d. T: abdominal acupuncture.	C: BT.	TwfH: mild gastrointestinal reaction and reduction of WBC. C: mild gastrointestinal reaction and reduction of WBC, abnormal liver and renal function, acne and sporic dental ulcer and so on.
Ye Zhizhong, et al/2011	AS	Shenzhen, Guangdong	40/35/20/35/23	>144ws	T	10-20mg, tid	NSAID, prednisone<10mg/d. V: methotrexate7.5-15mg/w.	I: sulfasalazine 1.5-3g/d, tid. II: methotrexate7.5-15mg/w. IV: sulfasalazine 1.5-3g/d, tid.methotrexate7.5-15mg/w.	III: 2gastrointestinal reaction, 1headache, 2amenorrhea, 3skin mucous membrane, 1reduction of WBC, 2elevation of transaminase. V: 3gastrointestinal reaction, 1headache, 2amenorrhea, 2skin mucous membrane, 2reduction of WBC, 3elevation of transaminase. I: 4gastrointestinal reaction, 1headache, 2skin mucous membrane, 1reduction of WBC, 1elevation of transaminase. II: 3gastrointestinal reaction, 2sk…
Yin Liping, et al/2009	Chronic renal transplantation nephropathy	Nanjing, Jiangsu	30/24	48ws	T	40mg, tid. Reduce to 20mg, tid after 1m.	BT: blood ciclosporin 0.08-0.12μg/L or tacrolimus 3-5μg/L. MMf 1.5-1.75g/d, ARB/ACEI or statin.	C: BT.	TwfH: 3herpes zoster, 4ALT elevation, 2menstrual delay or amenorrhea(normal after GTW withdrawal) , 1breast mass(benign lobular hyperplasia), 1male nipple swelling pain(symptoms gone after GTW withdrawal). C: no records.
Yuan Lijuan/1999	RHSPN	Qidong, Jiangsu	12/13	4-49ws, general 12ws	T	1-1.5mg/kgd, tid	none	C: prednisone1-2mg/kgd, bid or every other day.	TwfH: 3mild elevation of BUN and Cr, 2transient reduction of WBC<3.5*109/L, 1transient reduction of plateles, 1menstrual delay, 1reduction of menstrual blood volume, 1facial blood dots, 1abdominal pain, 1diarrhea. C: no records.
Zhang Enlin, et al/2004	RA	Sanming, Fujian	362/216	unclear	T and C	15-20g	T: herbal medicine.	none	T: 25.4%. C: 55.1%.
Zhang Jifeng/2012	Children AS	Tongliao, Inner Mongolia	50/50	unclear	T	3-5tablets/d for<10ys, 8-10tablets for >10ys.	none	C: naproxen or ibuprofen, short term prednisone 0.25-0.5mg/kgd.	TwfH: 3gastrointestinal reaction, 1reduction of WBC. C: 8gastrointestinal reaction, 4reduction of WBC, 1rashes, 2elevation of transaminase.
Zhang Li/2011	Severe post-operation endometriosis	Huangshi, Hubei	40/40	24ws	T	30mg/d, tid, 3d after operation	none	C: leuprorelin 3.75mg/m for 6times.	TwfH: 4mild gastrointestinal reaction, 2mild elevation of liver enzyme, 3reduction of WBC. C: vasomotion syndrome and osteoporosis. All amenorrhea after 1st treatment, 36low level estrogen symptoms like hot flash, night sweat, vaginal dryness and dysphoria.
Zhang Liang, et al/2007	Psoriasis vulgaris	Sanming, Fujian	70/50	8ws	T	20g	BT: Que'en cream twice/d.	C: Compound Qingdai pill, 1package, tid.	TwfH: 4gastrointestinal discomfort, 5extended menstruation and reduction of blood volume. C: 3diarrhea.
Zhang Meijian, et al/1993	RA	Nanjing, Jiangsu	106/44	unclear	T and C	unclear	unclear	unclear	I: 30, most gastrointestinal reaction(mild loss of appetite, abdominal discomfort, abdominal distension), few palpation, chest stufly, oliguria, dental ulcer and reduction of menstrual blood volume. 1kind of adverse events 13, 2kinds 3, >3kinds 4. II: 33, 31gastrointestinal reaction, others like in I. 1kind of adverse events 5, 2kinds 10, >3kinds 18.
Zhang Minou/2009	Mesangial proliferative nephritis	Hangzhou, Zhejiang	51/58	18>48ws, 33<48ws	C	30-60mg/d, tid. If possible every other day.	C: symptomatic treatment.	T: pavlin 0.6-1.2g/d, bid.	TwfH: 12abnormal liver function, 9menstrual disorder or amenorrhea, 7reduction of WBC or platelet. T: 8loss stool and diarrhea.
Zhang Rong, et al/2011	EORA	Shenyang, Liaoning	30/30	>48ws	T	20mg, tid	BT: NSAID. T: leflunomide 20mg/d.	C: leflunomide 20mg/d.	TwfH: 3gastrointestinal reaction, 1reduction of WBC, 1abnormal liver function, 1rashes, 1respiratory infection. C: 1gastrointestinal reaction, 1reduction of WBC, 1rashes, 1respiratory infection.
Zhang Weizhen, et al/1994	Children nephropathy	Nanjing, Jiangsu	29/18	35-353ds, average102.8ds	T	1-1.6mg/kgd	none	C: prednisone.	T: 7/17dysspermia(3/5 for preschool children, 4/12 for school children). C: none.
Zhang Weizhen/1996	Children nephropathy	Nanjing, Jiangsu	20/18	67-710ds, average 191ds	T	1-1.7mg/kgd	T: prednisone 1.5mg/kgd, chlorambucil0.1-0.2mg/kg.	C: prednisone 1.5mg/kgd.	T: 4undeveloped penis and testis, 10/11abnormal semen, 2no children 2-4ys no children. 4/5abnormal semen <6ys, 6/6>6ys. C: normal.
Zhang Yisen/2012	Psoriasis vulgaris	Ninghai, Zhejiang	60/60	8ws	T and C	15mg, tid	BT: erythrocin 150mg, tid. 0.05%clobetasol cream. T: compound glycyrrhizin 40ml IV dripping, 3times/w.	none	TwfH: 5dry mouth, 3desquamation, 2itching. C: 10dry mouth, 5desquamation, 1itching, 1diffusive hair loss, 1dry skin mucous membrane.
Zhao Dechun/2012	RNS	Suining, Sichuan	38/40	unclear	T and C	I: 20mg, tid. II: 30mg, tid. Maintain 20mg, tid if relieved and for 3ms.	BT: prednisone 1mg/kg for 8ws, reduce 5mg/3-4ws to 30mg/d, then 60mg every other day, then reduce 5mg/3-4ws to 30mg every other day. Common treatment like blood pressure control drugs remain.	none	I: 4drug induced liver injury, 2gastrointestinal reaction, 2myelosuppression, 5menstrual disorder, 3infection, 3Scr more than 50% of normal. II: 6drug induced liver injury, 4gastrointestinal reaction, 2myelosuppression, 5menstrual disorder, 3infection, 2Scr more than 50% of normal.
Zhao Tong/2005	RA	Neihuang, Henan	50/20	24ws	C	20mg, tid	none	T: Tongbi decoction.	TwfH: gatrointestinal reaction, reduction of menstrual blood volume, amenorrhea and so on. T: none.
