# Supplementary material for: Safety Profiles of Tripterygium wilfordii Hook F: A Systematic Review and Meta-Analysis
Source: Front Pharmacol. 2016 Nov 8;7:402. doi: 10.3389/fphar.2016.00402 (PMC5099241; doi:10.3389/fphar.2016.00402)
Supplement: Supplementary file 7 [file DataSheet7.xls]

## Sheet: Sheet1
Author/year	Age/gender	Disease treated	Dosage	Adverse events
Bi Kebo/2000	50/M	RA	TWHF root 250 g/day for 2 days	Epigastric discomfort, vomitting, diarrhea. The 7th day, hematuria. The 10th day, dysphoria, without consciousness and less uria.
Cao Guojian/1993	52/M	RA	Tripterygium glycosides tablet, 20mg, tid, 15 days	Several erythema nodosum (four limbs).
Cao Yan/1995	35/F	Eosinophilic fasciitis	TWHF syrup, 15ml, tid, 7 months	Attack and diagnosed as secondary aplastic anemia.
Cao Yan/1995	56/F	RA	TWHF tablets 20mg, tid, 4 months	Unclear high fever and pustules on legs. Diagnoses as agranulocytosis.
Chen Guiji/2000	15/M	NS	Tripterygium glycosides tablet 1mg/kg,d, tid, 3 days	Red swollen scrotum
Chen Ning/1993	32/F	RA	Intermittent drug treatment with TWHF	Uterus size 5 × 2.5 cm
Chen Yuanhui/1999	32/M	RA	TWHF whole plant 30g (one draught)	Two hours later, dizziness, repeated nausea, vomiting, lower back pain, general weakness, precordial region stuffy and distending pain. About 24 hs more sever and sent to the hospital, with consciousness, extreme dysphoria, look blue, arrhythmia.Six hours later, death occurred.
Chen Yuanhui/1999	70/M	Arthritis and left lower limb pain and numbness	TWHF whole plant 60g (one draught)	Three hours later, dry mouth, nausea, repeated vomiting with abdominal pain. 3 days later, general weakness, unbearable precordial region stuffy and distending pain and dysphoria. With consciousness, extreme dysphoria, look blue, cold limbs, soft neck. Fifteen hours later (admission), death occurred.
Chen Yuanhui/1999	18/F	RA	TWHF root 50 g/day for 4 days	Vomiting, abdominal pain
Cui Xiaomei/1988	32/M	Rrapidly progressive glomerulonphritis,RPGN	Tripterygium glycosides tablet 30mg,tid	Two days later, abnormalities of the peripheral blood.
Dang Ruiyun/1995	53/F	Panniculitis	Tripterygium glycosides tablet 2 pieces, tid	Seven days later, nausea, abdominal pain and diarrhea; palpebral oedema and blister; nostril, lips and perianal erosion and ooze; general discomfort.
Feng Ding/1991	36/M	Rachitis	TWHF for 9.5 Years	Severe anaemia. And tests indicated aplastic anemia.
Feng Guoan/2005	70/M	Nephritis	Tripterygium glycosides tablets 30mg, tid, 22 days	Urine protein, increased stool frequency, bloody stool. Diagnosed as acute aplastic anemia.
Feng Guoan/2005	26/M	Nephrotic syndrome	Tripterygium glycosides tablets 20mg, tid	Twenty-five days later, fever, diarrhea 3-4 times/day. Diagnosed as acute aplastic anemia.
Feng Guoan/2005	35/F	Oral lichen planus	Tripterygium glycosides tablets 20mg, tid, 4 months	Idiopathic neutropenia
Fu Binhong/2004	32/M	RA	TWHF whole plant, 45g, decoction.	Two hours later, dizziness, repeated nausea and vomiting, abdomen pain, lower back pain, general fatigue and precordia swelling pain. Diagnosed as GTW toxicity caused toxic myocarditis with CGS and renal injury. Failure in rescue and 6 hs in hospital die.
Fu Binhong/2004	70/M	Arthritis	TWHF whole plant, 60g, decoction.	After three hours, dry mouth, nausea, repeated vomiting and paroxysmal abdomen pain. 3 days, general fatigue, precordia stuffy and swelling pain, dysphoria. Diagnosed as GTW toxicity caused toxic myocarditis with CGS. Failure in rescue and 15hs die.
Fu Binhong/2004	18	RA	TWHF root, 50g, decoction, 4 days	The 5th day, general fatigue, paroxysmal abdominal pain, nausea, precordia stuffy and discomfort, cold limbs. Diagnosed as GTW toxicity with ALF, ARI and CGS.
Gao Qiaoyan/2002	43/M	RA	TWHF 500g, qid	The second day, abdominal pain, diarrhea, nausea, vomiting. 3rd day, hematuria, obvious reduction of uria, general weakness, sweating for one day.
Hao Xiangchun/1993	70/F	Right knee pain	Tripterygium glycosides tablets, 20mg, tid	After the use of 80mg tablets, unbearable calves soreness and pain.The rashes spread over thighs and hip.
He Mancang, etc/2006	23/F	IgA Nephropathy	Tripterygium glycosides tablets 20mg, tid, 3 months of intermittent therapy.	Loss of appetite, right upper quadrant discomfort, icteric sclera and yellow urine. AST 854U/L, ALT 1040U/L, Cr 98.6μmol/L, BUN 7.2mmol/L.
He Mancang, etc/2006	42/M	RA	Tripterygium glycosides tablets 20mg, tid, 15 days	Discomfort on liver region and lower back pain. AST 185U/L, ALT 299U/L, Cr 175.8μmol/L, BUN 13.6mmol/L.
He Mancang, etc/2006	40/F	RA	Tripterygium glycosides tablets 20mg, tid, 50 days	Dizziness, loss of appetite, epigastric discomfort, fatigue and subcutaneous ecchymosis. AST 182U/L, ALT 254U/L, Cr 96.3μmol/L, BUN 9.2mmol/L. Mentruation lasting half a m and menorrhagia.
Huang Guangzhao, etc/2009	22/F	Suicide	A bunch of TWHF leaves.	Nine hours later, gastrointestinal reaction, progressively aggravation, rescue failure and death in the 32th day.
Huang Guangzhao, etc/2009	52/M	Murder	Dry TWHF root 50g	20 minutes later, vomiting and diarrhea, rescue failure and death in the 6th hour.
Huang Guangzhao, etc/2009	59/M	RA	Huangteng mixture	Abdominal pain, vomiting, diarrhea, chest stufly, progressive aggravation, BP decrease and heart rate increase, arrhythmia. Death in 6th day.
Huang Guangzhao, etc/2009	25/F	RA	TWHF mixture (patient herself increased dosage)	Acute toxicity, death in 15th day.
Jin Damao/1993	57/M	NS	TWHF tablets, first 2pieces, tid, 20days later increased to 3pieces, tid, altogether for 1 m.	urine protein decreased but with diarrhea and lower abdominal pain, stool first like yellow paste or in water, then mucous, 3-7 times a day, fever, 38 degree. Intravenous dripping of penbritin (6g/d) and no relieving. 1week later, stool like soy sauce, 6-8 times per day, with membranoid substance in and diagnosed as Pseudomembranous colitis.
Jin Liping/2001	62/M	RA	TWHF tablets 1piece, tid	1 week, chest stufly and short of breath. Diagnosed as sinus bradycardia.
Jin Liping/2001	59/M	type 2 diebetes with complication of nephrosis and coronary heart disease	Shenyankang capsule( TWHF, Astragalus membranaceus, etc). Insulin injection.	2 weeks, bradycardia.
Ke Kunyu/2009	52/F	SALF	GTW 20mg, bid, 1m	20 days of fatigue, reduced appetite, yellow uria, yellow eyes and 5 days of rashes
Li Baochun, etc/1991	34/F	SLE	GTW 20mg, tid.	1m, fever, cough, lips herpes. Penicillin, fever gone but dental ulcer. 2 ms, diarrhea in water, ＞10times/d, extreme pain around the umbilical before stool, Cushing's syndrome, both corners of the mouth erosion, several buccal mucosa erosion with curdy plaques, some red maculopapules.
Li Baochun, etc/1991	53/F	SLE	GTW 20mg, tid. Prednisone 60mg, each morning. CTX 50mg, bid.	18days, upper gastrointestinal hemorrhage.
Li Baochun, etc/1991	65/M	RA and interstitial nephritis	GTW 30mg, tid.	2 weeks, frequent vomiting.
Li Haiyan/2010	15/M	nephritis of Schonlein-Henoch purpura	GTW 480mg for once	dull abdominal pain, ALT49.1U/L, AST 35.0U/L, S/T0.7, GGT21.2U/L.
Li Huangeng, etc/1998	47/F	Systomatic sclerosis	GTW 10mg, tid. Prednison 60mg, qd. Compound Danshen injection 16ml. Low molecular dextran intracenous dripping 500ml.	10days, atrioventricular block aggravated, atrioventricular dissociation, ventricular rhythm.
Li Xiangyang/2010	33/F	Intermittent dizziness, fatigue and loss of appetite	TWHF tablets, 1.5g, tid	3days, gradual dizziness, fatigue, loss of appetite, nausea, vomiting.(the author thought it to be pure red cell aplasia)
Lin Ping/1992	20/F	Knees and ankle pain	TWHF tablets 1piece( Hubei Huangshi Pharmacy, each contain triptolide 33ug), tid	half a m later, pain of joints relieved but with dizziness, tinnitus, palpation, chest pain, abdominal pain. Diagnosed as acute aplastic anemia.
Lin Weimin/2006	20/M	Intermittent swelling	GTW 40mg, tid, injection of large dose of Astragalus, puerarin, persantine and Ramipril.	about 10 days, irregular abdomen pain and diarrhea. Dosage reduction, no obvious improvement and fever, 38.6 degree, epistaxis. PLT and WBC successively fell sharply. 18th day in the hospital GTW withdrawal. Diagnosed as pancytopenia.
Liu Guangcan/2004	35/F	Endometriosis	TWHF tablet, 3pieces, tid	20 days, both cheeks, esp, cheekbone area, pigmentation in small dots and freckle, yellowish-brown, brown, or so.
Liu Guangxia/1997	23/M	NS	GTW 20mg/d, tid. 3days, patient himself increased to 60mg/d, tid.	1 week, sudden headache, high fever(40 degree). Diagnosed as myelosuppression.
Liu Guangxia/1997	21/M	NS	GTW 20mg/d, tid. 3days, patient himself increased to 40mg/d, tid.	half a m, general discomfort, abdominal pain, diarrhea, fever. Diagnosed as myelosuppression.
Liu Lei/2000	34/F	NS	GTW 1.5g/kgd(2 pieces, tid) with prednisone.	5th week, finger joints pain and then toe joints pain, aggragating. 10th week, GTW reduction, joints pain relieved. 2 ms after withdrawal, pain gone.
Liu Xiushu, etc/2008	45/F	CNS	GTW 20mg, bid, safflor injection 20ml, dipyridamole 50mg, tid.	8days, GPT 80.90U/L, AST 54U/L.9days, GPT 125.7U/L, AST 80U/L
Lu Fang,etc/1995	1. 50/M;	Chronic nephritis	GTW 30mg, tid, 2 weeks	left lower abdomen pain, bloody and water like stool 4-5 times/d and 200-300g each time. Diagnosed as acute aplastic anemia and ulcerative and hemorrhagic colitis.
Lu Fang,etc/1995	2. 74/F	Pulmonary infection secondary to chronic bronchitis and RA	long time intaking of TWHF tablets. 4th day retake TWHF tablets, 4pieces, tid. Mistake of GTW for TWHF tablets, 40mg, tid, 20days.	several ulceration like oral ulceration, back and chest ulceration, etc. also fever, abdomen pain, diarrhea, bloody stool 4-6 times per day, about 500-800g/d, obvious pressing pain, rebound tenderness and local muscular tension in right lower abdomen.
Lu Xiaohe, etc/1993	1. 26/F;	SLE	GTW 20mg/d, tid.	10 days, acute granulocytopenia with diarrhea
Lu Xiaohe, etc/1993	2. 17/M	SLE	GTW 20mg/d, tid.	6 days,acute granulocytopenia with diarrhea
Ma Liping/1997	42/M	RA	TWHF root 50g, decoction, 15days. No relief and increase to 100g.	the 2nd day lasting and extreme epigastrium pain, paroxysmal intensity, with dizziness, headache, nausea, vomiting dark red fluid, dark stool for once about 100ml, oliguria. The following day, blood stool for once. Diagnosed as multiple organ failure.
Pan Guiguang/2003	60/F	RA	GTW 30mg, tid.	1day, itching all over, not much attention. 3days, unbearable itching, eyelid and face swelling.
Pei Fang, etc/2003	30/M	Repeated edema and oliguria	GTW 20mg, tid, with prednisone, hydrochlorothiazide and dipyridamole.	the 2nd day the whole body covered with red rashes in different sizes, more in breast and abdomen, in flake and fade with pressure, with general itching.
Qian Weijun/1982	27/F	Leprosy	TWHF 30g/d, 2 Ws	After one week, stomach discomfort, loss of appetite, vomiting, abdominal pain, loose stool, dry hair and diffusive hair loss. After two weeks, severe gastrointestinal reactions, heavy hair loss.
Qian Weijun/1982	46/M	Leprosy	TWHF 30g/d	2. 1 week: Severe gastrointestinal reactions, diffusive hair loss. TWHF cessation and 3 days of fluid infusion, gastrointestinal reaction improved.
Shen Shifang/1979	37/M		TWHF wine, 250ml	vomiting ＞10 times at night, first food and than yellow bitter water, not allow food in, general and sharp joints and muscle pain, unable to walk, facial puffiness, fever, thirst for fluid, sweating, bad appetite, urine volume 3500ml/d.
Shen Shifang/1979	24/M		TWHF wine, 3 people 0.75kg.	immediate vomiting, fever, lower back pain, bad appetite, sharp pain in the urethra, frequent and urgent urination, urine volume 4000ml/d, with dizziness, fatigue, nausea, vomiting, thirst for fluid.
Shen Shifang/1979	66/M	Joint pain	TWHF wine, 100ml for 2days.	12 am that night, abdominal pain, swollen lips eversion, nausea, vomiting, diarrhea, thirst for fluid, general muscle pain, gastrocnemius and biceps brachii muscle most obvious, sharp pain in the urethra, frequent and urgent urination, urorrhagia, severe swelling pain in kidney area, paroxysmal afraid of cold, forehead cold sweat, general fatigue, bad appetite.
Shi Jianhui/2003	29/F	RA	herbal pills with TWHF, 6g, bid, with Radix Aconiti, Caulis Spatholobi, etc.	1 m, facial pigmentation. 4 ms, amenorrhea, in all 5 ms.
Shi Jianhui/2003	35/F	RA	TWHF extract tablets( each contain triptolide 33ug) 3pieces, tid.	6ms, menstrual blood volume reduction. 1 yr, amenorrhea. Nearly 2yrs, hot flash, sweating, vaginal dryness, dyspareunia.
Shou Xiaozhu/1999	36/F	Early pregnance	insert 2 TWHF roots(2-3cm) in the vagina to induce labour	that night paroxysmal pain of the lower abdomen, cold, fever and vomiting. Diagnosed as acute renal function failure, etc.
Su Jiashan/2000	43/F	RA	TWHF 15g, decoction.	After 1 course of treatment, stomachache, abdominal pain, diarrhea.
Su Jiashan/2000	55/M	Arthritic psoriasis	TWHF 16g, decoction.	4days, nausea, vomiting, abdominal pain,diarrhea in water.
Tian Xiaosun/1993	59/M	RA	GTW 10mg/d, tid.	2 ms, diplopia.
Tu Xiao, etc 2001	50/F	Joints pain	decoction with TWHF 100g.	about 5hs later, acute vomiting with dizziness, fatigue and oliguria. No urine after 3d. Diagnosed as GTW toxicity, acute renal function failure, acute toxic hepatitis.
Wan Dongmei/2002	48/F	RA	GTW 30mg, tid for 11ms.	afraid of cold, fatigue, abdominal distension, loss of appetite and facial puffiness, diagnosed as hypothyroidism.
Wang Dongyang/2003		Swelling face	TWHF decoction	swelling aggravation, headache, transient loss of consciousness, fever, blood urine, blood stool, 3days without urine. Diagnosed as acute renal failure, TWHF caused multiple organ injury , acid-base and electrolyte balance disorder.
Wang Jianxiong/2007	46/F	RA	TWHF 15g/d, in all 60g	3rd day, abdoninal pain, frequent nausea, vomiting. 4th day, oliguria, swelling face and lower limbs, general unbearable pain, cold limbs, chest stufly, short of breath, cough, expectoration. Diagnosed as multiple organ failure.
Wang Jianxiong/2007	40/F	RA	TWHF 15g/d, in all 61g	4 days, abdoninal pain, frequent nausea, vomiting. 4th day, oliguria, swelling face, general unbearable pain, cold limbs, chest stufly, short of breath, cough, expectoration, dark stool. Diagnosed as TWHF toxicity, acute interstitial nephritis, toxic hepatic injury , acute gastritis.
Wang Jianying, etc/2003	52/M	PNS	TWHF 2tablets, tid for about 2ws with prednisone, persantine, heparin	yellow urine, skin itching, general progressive yellow skin. AST 581U/L, GPT 353U/L, GGT942U/L. Diagnosed as cholestatic hepatopathy.
Wang Lei/2012	41/M	Psoriasis	GTW 30mg, tid.	3 days, dizziness, fatigue, low fever.
Wang Xiju/1994	37/F	RA	TWHF tablets, 2pieces, tid.	5days, dizziness, general fatigue.
Wang Yanni/2000	42/M	RA	TWHF root, 240g for twice	3days, epigastric discomfort, nausea, vomiting, diarrhea. IV injection of Amikacin for 2 days. 5days, uria like water from washing the meat, and then dysphoria, unconsicious, oliguria. Diagnosed as acute renal failure.
Wang Yanni/2000	39/M	Ischialgia	TWHF 150g/d	9hs, general itching, facial swelling, prgressive aggravation, dizziness, chest stufly, limb pain, nausea, vomiting, diarrhea. Diagnosed as TWHF toxicity, acute dermatitis, granulocytopenia.
Wang Yanni/2000	59/F		14 TWHF shoots	1h, extreme paroxysmal abdominal pain, nausea, frequent vominting coffee-like fluid, then gradual pale complexion, short of breath, cold limbs, oliguria.
Wu Guanghua/1997	34/F	recurrent proteinuria and microscopic hematuria	GTW 20mg, tid, with prednisone, persantine and Piperazine ferulate tablets, etc.	12 days, fever, general fatigue, sore throat and mouth ulcer. Diagnosed as acute granulocytopenia.
Wu Tiejun/1993	54/M	NS	TWHF tablets( each contain 10mg)3piece, tid.	the 3rd night, unbearable soreness and numbness of upper limbs and knees, cannot relieved by rest.
Xu Jiayin/2012	27/M	Proteinuria	GTW 20mg, tid, 2yrs.	dysspermia
Xu Zhi, etc/2005	9/M	Nephritis	GTW 10mg, tid, all 1800mg.	dizziness and fatigue 10 days, gum bleeding 2 days.
Xu Zhi, etc/2005	74/F	cough and fever/CNS	GTW 20mg, tid, 4ms	general sporadic ecchymosis.diagnosed as severe aplastic anemia.
Yang Longxiu/1995	48/F	Limb joints pain	TWHF tablets 40mg, 3times per day for 15 days.	epigastrium discomfort, dizziness, fatigue, loss of appetite, deep yellow urine. 20 days further with TWHF tablets and the above symptoms aggravated. Then diagnosed as hepatocellular jaundice.
Yang Songru/1993	49/M	RA	TWHF for long time, with aspirin, prednisone, dexamethasone, indometacin, etc.	death from liver ascites.
Yang Songru/1993	37/F	Joints pain	TWHF for long time	death from liver ascites.
Yang Weiwei/2000	57/F	CHD	GTW 20mg, bid.	6 days, fatigue, somnolence, thrombocytopenic.
Zhang Huiyun/1999	33/F	Glomerulonephritis	TWHF 2tablets(each with 33μg triptolide), tid for 6ws.	fatigue, loss of appetite, nausea, abdominal distension, vomiting and yellow urine. ALT 2322U/L, TBILμmol/L.
Zhang Huiyun/1999	36/M	Subsepsis allergica	TWHF 2tablets(each with 33μg triptolide), tid for 22ws.	fatigue, loss of appetite, nausea, abdominal distension, vomiting and yellow urine.
Zhang Qing/1997	35/F	Acute glomerulonephritis	GTW 40mg/d,prednisone 60mg/d	12days, dizziness, palpation, sweating (aggravation after activity).
Zhang Qingxiang/2004	34/F	Psoriasis	GTW 20mg, tid. Compound qingdai pill 6g, tid. Tretinoin Cream external use.	5 days,metrorrhagia, not much, dripping.
Zhang Shuying/1995	24/F	RA	GTW 20mg, tid.	6 ms: menstruation disorder. 7 ms: amenorrhea with sexual hypoactivity.
Zhang Shuying/1995	28/F	RA	GTW 21mg, tid.	the second m menstrual blood volume decreased and then amenorrhea, with vaginal dryness, sexual hypoactivity, breast diminished, and occasional heat and sweating.
Zhang Yigu, etc/1985	25/F	RA	Patient increased the dosage by herself	Loss of appetite, abdominal pain, abdominal distension, nausea, vomiting, dizziness, palpitation, lower backache, hematochezia, etc and finally death.
Zhao Huili/1995	82/F	Joint deformity and soreness	GTW 2pieces, tid with fenbid 300mg, bid.	8 days, diabrosis under the arms, around the groin and the anus. Ooze uhder the armpits.
Zhao Shuping/2000	40/M	Rash	GTW 30mg, tid.	6days, facial erythema papule, herpes around the lips in different sizes, painful, local skin fever, waist pain, urine in strong tea color.
Zhong Fugao, etc/2006	71/M	RA	GTW 40mg, tid, with antibiotics	30 days, paroxysmal abdomen pain, mainly around the umbilical, with diarrhea in water, yellow, 5-6 times/d, sheet erosion around the mouth, scrotum and groin, afraid of cold, fever, body tempreture remain 39 degree. Diagnosed as acute aplastic anemia.
Zhong Fugao, etc/2006	69/F	RA	GTW 40mg, tid.	18 days, abdomen pain and diarrhea, about 5 times/d in water, fever, 38 degrees or so. Diagnosed as acute aplastic anemia.
Zhong Fugao, etc/2006	69/M	RA	GTW 20mg, bid, 6ms	discomfort, epistaxis and nausea for more than 1 m, diarrhea and fever/epistaxis, lots of petechiae and ecchymoses all over, sporadic blood spot in oral mucosa, throat congestion.Diagnosed as acute aplastic anemia.
Zhou Fengwei/2009	35/F	Lower limbs edema	GTW 20mg, tid.	20 days, facial pigmentation, in small dots and freakles on the cheeks, most obvious in the cheek bone area, symmetric distribution, brown or dark or so, no in other parts.
Zhou Wangfen, etc/2002	63/M	OLP	GTW 20mg, tid for 30d.	Fatigue, loss of appetite, sick of oil. Diagnosed as acute liver function injury caused by GTW.
Zhou Zhongshu, etc/1992	5/M	NS	TWHF tablets 3pieces, tid.	the 3rd day, nausea, vomiting. 7th day, dark red erythema in different size on the face, hips and lower limbs with itching, then occasional long exhale and fatigue. The 65th day, abdominal pain with fresh blood stool and much epistaxis. Diagnosed as multisystem injury .
